# Supplementary material
Source: HighWire-hosted journal article supplement (https://bjsm.bmj.com/content/52/23/1539)
Supplement: inline-supplementary-material-2 [file inline-supplementary-material-2.docx]

**Developing consensus on clinical assessment of acute lateral ankle sprain injuries: protocol for an international and multi-disciplinary modified Delphi process [Study Protocol Document]**

**ABSTRACT**

**BACKGROUND:** Lateral ankle sprains are the most frequently incurred lower limb musculoskeletal injury by individuals who participate in sports and recreational physical activities. In order to ensure optimal management of individuals who have incurred an acute lateral ankle sprain injury, clinical assessments should evaluate whether mechanical and sensorimotor impairments are present in the acute phase of injury. Using a modified Delphi process, our aim is to inform discussions regarding the development of an international and multi-disciplinary consensus on the clinical assessment of acute lateral ankle sprain injury.

**METHODS:** An international and multi-disciplinary steering committee with varying levels of clinical, academic and research experience was formed to develop and conduct this study. The research methods were established amongst the steering committee members. The steering committee determined the study objective, inclusion criteria for the expert panel and developed the domains for an anonymous online questionnaire. Our modified Delphi process will start with an anonymous online questionnaire. Members of the executive committee of the International Ankle Consortium will be invited to participate.

The responses to the online questionnaire will be collated, analysed and used as the foundation for a subsequent consensus meeting of the executive committee of the International Ankle Consortium.

**CONCLUSION:** Our modified Delphi process will inform the development of a consensus guideline on the clinical assessment of acute lateral ankle sprain injuries. It is envisaged that this consensus guideline will help clinicians to identify anomalous mechanical and sensorimotor impairments known to contribute to the development of chronic ankle instability.

**Introduction***Epidemiology of lateral ankle sprain injury*

Lateral ankle sprain injury has been identified as one of the most prevalent musculoskeletal injuries sustained by people who partake in competitive sports or recreational physical activities.1-3 Internationally, lateral ankle sprain injuries account for a large percentage of all musculoskeletal injury patients visiting Emergency Departments. In the UK alone, lateral ankle sprain injuries account for 3-5% of all Emergency Department attendances.4 Similarly, over 200,000 ankle sprains are seen annually just in US Emergency Department,5,6 but the actual rates of occurrence in the population are likely to 2-3 times higher.7,8 For example, in the Netherlands alone, it has been estimated that 600,000 people sustain a lateral ankle sprain injury ever year.9

*Development of long-term symptoms and chronic ankle instability*

In spite of the high prevalence, lateral ankle sprain injuries are typically regarded as innocuous injuries that will resolve quickly with little or no treatment.8, 10 The reality is quite different, as the recurrence rate of lateral ankle sprain injury is very high and coincides with the development of several long-term symptoms.11-13 Following an acute lateral ankle sprain injury, pain and swelling are commonplace,14 contributing to reduced functional capacity,14 and occupational absence.15 The development of these symptoms, which also include “giving-way” of the ankle joint, a subjective reporting of ankle joint instability and recurrent ankle sprain are archetypical of a condition known as chronic ankle instability.16 Contemporaneous research highlights that up to 40% of individuals can be expected to develop chronic ankle instability within 1-year of sustaining their first-ever lateral ankle sprain injury.17 In agreement with this, a systematic review identified that approximately 33% of patients with a history of lateral ankle sprain injury will still experience pain and instability, 34% report at least one re-sprain, and up to 64% state that they have not recovered fully 1-year after the conclusion of the “standard of care”.18

*Post-injury deficits: mechanical and sensorimotor insufficiencies*

The progression of chronic symptoms following lateral ankle sprain injury are founded in a combination of mechanical and sensorimotor impairments, which are observed after the injury.11-13, 19 Isolated injuries of the lateral ligamentous complex of the ankle joint following lateral ankle sprain injury are rare.20 Peroneal tendon pathologies, concomitant ligamentous and syndesmotic injuries, anterolateral impingement or osteochondral lesions are highly prevalent in individuals following lateral ankle sprain injury,21 and in persons with chronic ankle instability.22 Perhaps most pertinently, it has been identified that chronic ankle disorders such as ankle joint osteoarthritis affect almost 20% of the community population, with the majority being attributable to a previous ankle sprain injury.23 Furthermore, a body of literature is available to support the presence of sensorimotor impairments in subjects with CAI, manifesting as anomalies across a “spectrum” of human movement.24-28 These anomalous movement patterns are considered to be at the crux of the long-term sequalae of chronic ankle instability.29 A recent cohort study serially tested individuals after they had sustained a first-time lateral ankle sprain injury;17 these individuals displayed apparent sensorimotor aberrancies during static postural control,30-32 dynamic balance,33, 34 gait,35, 36 and jumping/landing tasks37-40 in the acute and sub-acute phases of injury. Many of these aberrancies were deemed to have directly contributed to the development of chronic ankle instability.17

*Consensus on the clinical assessment of acute lateral ankle sprain injury*

Before effective management protocols for lateral ankle sprain injury can be developed and implemented, it is pertinent that a best practice, evidence-based approach in the clinical assessment of lateral ankle sprain injury must first be established. Second to diagnosis of the acute injury, the aims of the clinical assessment must address any mechanical and sensorimotor impairments present in a patient. Identifying the presence or absence of mechanical and sensorimotor impairments in the initial assessment may provide indication if the patient is at risk for the development of chronic ankle instability following their acute lateral ankle sprain injury. Furthermore, a structured clinical assessment guideline that assesses for these aberrancies can be subsequently used to ensure that the patient undertakes a more efficient and appropriate management pathway. A more robust rehabilitation protocol, may in turn, reduce the likelihood of the development of the long-term sequalae associated with chronic ankle instability.

Developing structured, best practice, evidence-based guidelines for the clinical assessment of lateral ankle sprain injury could be achieved by a systematic expert opinion approach. The Delphi method involves a sequence of questionnaires or surveys used to ascertain expert consensus on clinical issues.41, 42 Using this approach, our aim is to inform discussions regarding the development of an international and multi-disciplinary consensus on the clinical assessment of acute lateral ankle sprain injury, which may help clinicians identify anomalous mechanical and sensorimotor impairments known to contribute to the development of chronic ankle instability. We will use a modified Delphi method in a group of clinicians, academicians and researchers. This procedure will serve as part of the preparation for the 7th International Ankle Symposium executive committee meeting and the development of a consensus article on the clinical assessment of lateral ankle sprain injuries.

**Methods and Design**

In order to inform an international and multi-disciplinary consensus on the clinical assessment of acute lateral ankle sprain injuries we will undertake a modified Delphi method. A Delphi process is used to form an expert consensus based on the feedback from a group of experts participating in subsequent rounds.43 Our modified Delphi process will start with an anonymous online questionnaire. The responses to the online questionnaire will be collated, analysed and used as the foundation for a subsequent consensus meeting of the international, multi-disciplinary expert group.

**Steering Committee**
An international (Ireland, USA, Switzerland) and multi-disciplinary research group (DSB, AR, CD, PG, ED) with different levels of clinical, academic and research experience was formed to develop and conduct this study. The research methods were established amongst the steering committee members in weekly face-to-face meetings and via email following a literature search in PubMed. The steering committee determined the study objective, inclusion criteria for the expert panel and developed the domains for the online questionnaire. Pilot testing of the online questionnaire was undertaken (4 physiotherapists) and the feedback from this process was used to inform the development of a final draft of the online questionnaire.

**Generation of Online Questionnaire**

The online questionnaire consists of a number of distinct sections including: (1) participant demographics; (2) subjective assessment and patient reported outcome measures; (3) diagnostic imaging; (4) objective assessment (including asssessment of bony integrity, ligamentous integrity, range of motion, arthrokinematics, strength, neurodynamics, postural balance); (5) performance assessment. The online questionnaire is available as an online supplement.

**Selection of International Experts (participants and recruitment)**

Members of the executive committee of the International Ankle Consortium (n = 14) will be invited to participate. All members of this committee have published more than 3 peer-reviewed articles on the topics of lateral ankle sprain and chronic ankle instability, have presented at national and/or international symposia on these topics, and have contributed to previous consensus statements.11-13, 44, 45

**Ethics**
The online questionnaire includes an informed consent section which is required to be answered before participants can continue to the main sections. The methods of this study and content of the online questionnaire was approved by the University College Dublin Human Research Ethics Committee (LS-E-17-77-Remus-Delahunt). As part of the consent process, participants will agree to partake in the online questionnaire, as well as the consensus meeting that will take place a day before the 7th International Ankle Symposium, which is scheduled to take place at the University of North Carolina at Chapel Hill, USA, in September 2017.

**Delphi Procedure (data collection and data analysis)**

An email will be sent to all members of the executive committee of the International Ankle Consortium requesting their participation in the online questionnaire. To collate the responses to the online questionnaire we will use Google Forms as the hosting platform. The advantage is that participant responses can be conducted remotely and automatically downloaded to Microsoft Excel for aggregation and analysis. Participants will be required to complete the online questionnaire within 4 weeks of receiving the invitation email. A reminder email will be sent to all participants two weeks after the initial invitation email. With reference to the online questionnaire, participants will be requested to respond to questions related to the importance of different constructs of the clinical assessment of acute lateral ankle sprain injuries on a scale of 1 to 5 (1 = strongly disagree; 2 = disagree; 3 = no opinion; 4 = agree; 5 = strongly agree). They will also have the opportunity to elaborate further on how they would assess certain structures or functions by providing expanded answers to open-ended questions. The data from the responses to the online questionnaires will be collated and analysed. A cut-off score of ≥75% agreement is proposed for consensus. The results of the online questionnaire will then be presented by one of the authors to the participants at the executive committee meeting of the International Ankle Consortium, which is scheduled to take place the day before the 7th International Ankle Symposium (14th of September 2017). These results will then be utilized by the executive committee to formulate a consensus guideline on the clinical assessment of acute lateral ankle sprain injuries.

**Discussion**
We plan to collate and analyse the responses to the online questionnaire in a meaningful and statistically rigorous way to inform the development of a consensus guideline on the clinical assessment of acute lateral ankle sprain injuries. The development of this guideline will allow clinicians to undertake a thorough, best-practice and evidence-based clinical assessment of acute lateral ankle sprains injuries. This will allow them to identify anomalous mechanical and sensorimotor impairments known to contribute to the development of chronic ankle instability. The identification of such impairments could facilitate the administration of an evolved “standard of care” for lateral ankle sprain injury patients that may help to reduce the risk for the development of chronic ankle instability.

**Dissemination Plan**

The findings of this research project will be disseminated through peer-reviewed publications and presentations of the findings at national and international conferences.

**Delphi Study Status**

The online questionnaire will be completed by the end of July 2017. The responses to the online questionnaire will be collated and analysed in August 2017. The results of the online questionnaire will be presented to the executive committee members of the International Ankle Consortium the day before the 7th International Ankle Symposium. A peer-reviewed article detailing the consensus guideline on the clinical assessment of acute lateral ankle sprains will be subsequently published.

**References**

1. Doherty C, Delahunt E, Caulfield B, Hertel J, Ryan J, Bleakley C. The incidence and prevalence of ankle sprain injury: a systematic review and meta-analysis of prospective epidemiological studies. *Sports Med* 2014;44:123-40.
2. Fong DT, Hong Y, Chan LK, Yung PS, Chan KM. A systematic review on ankle injury and ankle sprain in sports. *Sports Med* 2007;37:73-94.
3. Hootman JM, Dick R, Agel J. Epidemiology of collegiate injuries for 15 sports: summary and recommendations for injury prevention initiatives. *J Athl Train* 2007;42:311-9.
4. Cooke MW, Lamb SE, Marsh J, Dale J. A survey of current consultant practice of treatment of severe ankle sprains in emergency departments in the United Kingdom. *Emerg Med J* 2003;20:505-7.
5. Feger MA, Glaviano NR, Donovan L, Hart JM, Saliba SA, Park JS, Hertel J. Current trends in the management of lateral ankle sprain in the United States. *Clin J Sport Med* 2017;27:145-52.
6. Shah S, Thomas AC, Noone JM, Blanchette CM, Wikstrom EA. Incidence and cost of ankle pprains in United States emergency departments. *Sports Health* 2016;8:547-52.
7. Waterman BR, Owens BD, Davey S, Zacchilli MA, Belmont PJ Jr. The epidemiology of ankle sprains in the United States. *J Bone Joint Surg Am* 2010;92:2279-84.
8. McKay GD, Goldie PA, Payne WR, Oakes BW. Ankle injuries in basketball: injury rate and risk factors. *Br J Sports Med* 2001;35:103-8.
9. Verhagen EA, van Tulder M, van der Beek AJ, Bouter LM, van Mechelen W. An economic evaluation of a proprioceptive balance board training programme for the prevention of ankle sprains in volleyball. *Br J Sports Med* 2005;39:111-5.
10. Medina McKeon JM, Bush HM, Reed A, Whittington A, Uhl TL, McKeon PO. Return-to-play probabilities following new versus recurrent ankle sprains in high school athletes. *J Sci Med Sport* 2014;17:23-8.
11. Gribble PA, Delahunt E, Bleakley C, Caulfield B, Docherty C, Fourchet F, Fong DT, Hertel J, Hiller C, Kaminski T, McKeon P, Refshauge K, van der Wees P, Vincenzino B, Wikstrom E. Selection criteria for patients with chronic ankle instability in controlled research: a position statement of the International Ankle Consortium. *Br J Sports Med* 2014;48:1014-8.
12. Gribble PA, Delahunt E, Bleakley C, Caulfield B, Docherty C, Fourchet F, Fong DT, Hertel J, Hiller C, Kaminski T, McKeon P, Refshauge K, van der Wees P, Vincenzino B, Wikstrom E. Selection criteria for patients with chronic ankle instability in controlled research: a position statement of the International Ankle Consortium. *J Athl Train* 2014;49:121-7.
13. Gribble PA, Delahunt E, Bleakley C, Caulfield B, Docherty C, Fourchet F, Fong DT, Hertel J, Hiller C, Kaminski T, McKeon P, Refshauge K, van der Wees P, Vincenzino B, Wikstrom E. Selection criteria for patients with chronic ankle instability in controlled research: a position statement of the International Ankle Consortium. *J Orthop Sports Phys Ther* 2013;43:585-91.
14. Aiken AB, Pelland L, Brison R, Pickett W, Brouwer B. Short-term natural recovery of ankle sprains following discharge from emergency departments. *J Orthop Sports Phys Ther* 2008;38:566-71.
15. de Bie RA, de Vet HC, van den Wildenberg FA, Lenssen T, Knipschild PG. The prognosis of ankle sprains. *Int J Sports Med* 1997;18:285-9.
16. Delahunt E, Coughlan GF, Caulfield B, Nightingale EJ, Lin CW, Hiller CE. Inclusion criteria when investigating insufficiencies in chronic ankle instability. *Med Sci Sports Exerc* 2010;42:2106-21.
17. Doherty C, Bleakley C, Hertel J, Caulfield B, Ryan J, Delahunt E. Recovery from a first-time lateral ankle sprain and the predictors of chronic ankle instability: a prospective cohort analysis. *Am J Sports Med* 2016;44:995-1003.
18. van Rijn RM, van Os AG, Bernsen RM, Luijsterburg PA, Koes BW, Bierma-Zeinstra SM. What is the clinical course of acute ankle sprains? A systematic literature review. *Am J Med* 2008;121:324-31.e6.
19. Hertel J. Functional anatomy, pathomechanics, and pathophysiology of lateral ankle instability. *J Athl Train* 2002;37:364-75.
20. Kerkhoffs GM, Kennedy JG, Calder JD, Karlsson J. There is no simple lateral ankle sprain. *Knee Surg Sports Traumatol Arthrosc* 2016;24:941-3.
21. Roemer FW, Jomaah N, Niu J, Almusa E, Roger B, D'Hooghe P, Geertsema C, Tol JL, Khan K, Guermazi A. Ligamentous injuries and the risk of associated tissue damage in acute ankle sprains in athletes: a cross-sectional MRI study. *Am J Sports Med* 2014;42:1549-57.
22. DiGiovanni BF, Fraga CJ, Cohen BE, Shereff MJ. Associated injuries found in chronic lateral ankle instability. *Foot Ankle Int* 2000;21:809-15.
23. Hiller CE, Nightingale EJ, Raymond J, Kilbreath SL, Burns J, Black DA, Refshauge KM. Prevalence and impact of chronic musculoskeletal ankle disorders in the community. *Arch Phys Med Rehabil* 2012;93:1801-7.
24. Brown CN, Padua DA, Marshall SW, Guskiewicz KM. Variability of motion in individuals with mechanical or functional ankle instability during a stop jump maneuver. *Clin Biomech (Bristol, Avon)* 2009;24:762-8.
25. Hertel J, Olmsted-Kramer LC. Deficits in time-to-boundary measures of postural control with chronic ankle instability. *Gait Posture* 2007;25:33-9.
26. Delahunt E, Monaghan K, Caulfield B. Changes in lower limb kinematics, kinetics, and muscle activity in subjects with functional instability of the ankle joint during a single leg drop jump. *J Orthop Res* 2006;24:1991-2000.
27. Monaghan K, Delahunt E, Caulfield B. Ankle function during gait in patients with chronic ankle instability compared to controls. *Clin Biomech (Bristol, Avon)* 2006;21:168-74.
28. Gribble PA, Hertel J, Denegar CR, Buckley WE. The effects of fatigue and chronic ankle instability on dynamic postural control. *J Athl Train* 2004;39:321-329.
29. Hertel J. Sensorimotor deficits with ankle sprains and chronic ankle instability. *Clin Sports Med* 2008;27:353-70.
30. Doherty C, Bleakley C, Hertel J, Caulfield B, Ryan J, Sweeney K, Delahunt E. Inter-joint coordination strategies during unilateral stance following first-time, acute lateral ankle sprain: A brief report. *Clin Biomech (Bristol, Avon)* 2015;30:636-9.
31. Doherty C, Bleakley C, Hertel J, Caulfield B, Ryan J, Sweeney K, Delahunt E. Inter-joint coordination strategies during unilateral stance 6-months following first-time lateral ankle sprain. *Clin Biomech (Bristol, Avon)* 2015;30:129-35.
32. Doherty C, Bleakley C, Hertel J, Caulfield B, Ryan J, Delahunt E. Postural control strategies during single limb stance following acute lateral ankle sprain. *Clin Biomech (Bristol, Avon)* 2014;29:643-9.
33. Doherty C, Bleakley C, Hertel J, Caulfield B, Ryan J, Delahunt E. Dynamic balance deficits 6 months following first-time acute lateral ankle sprain: a laboratory analysis. *J Orthop Sports Phys Ther* 2015;45:626-33.
34. Doherty C, Bleakley CM, Hertel J, Caulfield B, Ryan J, Delahunt E. Laboratory measures of postural control during the Star Excursion Balance Test after acute first-time lateral ankle sprain. *J Athl Train* 2015;50:651-64.
35. Doherty C, Bleakley C, Hertel J, Caulfield B, Ryan J, Delahunt E. Gait biomechanics in participants, six months after first-time lateral ankle sprain. *Int J Sports Med* 2016;37:577-83.
36. Doherty C, Bleakley C, Hertel J, Caulfield B, Ryan J, Delahunt E. Lower extremity function during gait in participants with first time acute lateral ankle sprain compared to controls. *J Electromyogr Kinesiol* 2015;25:182-92.
37. Doherty C, Bleakley C, Hertel J, Caulfield B, Ryan J, Delahunt E. Single-leg drop landing movement strategies 6 months following first-time acute lateral ankle sprain injury. *Scand J Med Sci Sports* 2015;25:806-17.
38. Doherty C, Bleakley C, Hertel J, Caulfield B, Ryan J, Sweeney K, Patterson MR, Delahunt E. Coordination and symmetry patterns during the drop vertical jump, 6-months after first-time lateral ankle sprain. *J Orthop Res* 2015;33:1537-44.
39. Doherty C, Bleakley C, Hertel J, Caulfield B, Ryan J, Delahunt E. Single-leg drop landing motor control strategies following acute ankle sprain injury. *Scand J Med Sci Sports* 2015;25:525-33.
40. Doherty C, Bleakley C, Hertel J, Sweeney K, Caulfield B, Ryan J, Delahunt E. Lower extremity coordination and symmetry patterns during a drop vertical jump task following acute ankle sprain. *Hum Mov Sci* 2014;38:34-46.
41. Powell C. The Delphi technique: myths and realities. *J Adv Nurs* 2003;41:376-82.
42. Fink A, Kosecoff J, Chassin M, Brook RH. Consensus methods: characteristics and guidelines for use. *Am J Public Health* 1984;74:979-83.
43. Diamond IR, Grant RC, Feldman BM, Pencharz PB, Ling SC, Moore AM, Wales PW. Defining consensus: a systematic review recommends methodologic criteria for reporting of Delphi studies. *J Clin Epidemiol* 2014;67:401-9.
44. Gribble PA, Bleakley CM, Caulfield BM, Docherty CL, Fourchet F, Fong DT, Hertel J, Hiller CE, Kaminski TW, McKeon PO, Refshauge KM, Verhagen EA, Vicenzino BT, Wikstrom EA, Delahunt E. Evidence review for the 2016 International Ankle Consortium consensus statement on the prevalence, impact and long-term consequences of lateral ankle sprains. *Br J Sports Med* 2016;50:1496-1505.
45. Gribble PA, Bleakley CM, Caulfield BM, Docherty CL, Fourchet F, Fong DT, Hertel J, Hiller CE, Kaminski TW, McKeon PO, Refshauge KM, Verhagen EA, Vicenzino BT, Wikstrom EA, Delahunt E. 2016 consensus statement of the International Ankle Consortium: prevalence, impact and long-term consequences of lateral ankle sprains. *Br J Sports Med* 2016;50:1493-35.
